# Supplementary material
Source: MDPI journal article supplement (https://www.mdpi.com/2227-9040/10/7/256)
Supplement: s1 [file s1 › chemosensors-1771506-supplementary.pdf]

# UV-excited fluorescence as a basis for the in-situ identification of natural binders in historical painting: a critical study on model samples - Supplementary Materials

Margherita Longoni, Ester Sara Cacciola and Silvia Bruni

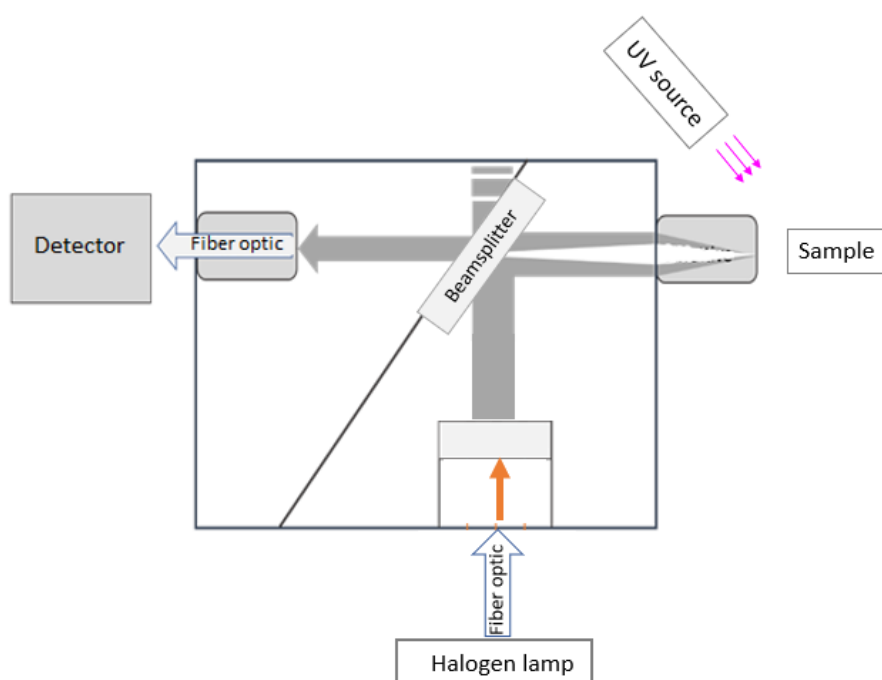

**Figure S1.** Schematic diagram of the portable spectrometer used for UV-excited fluorescence and visible reflectance measurements.

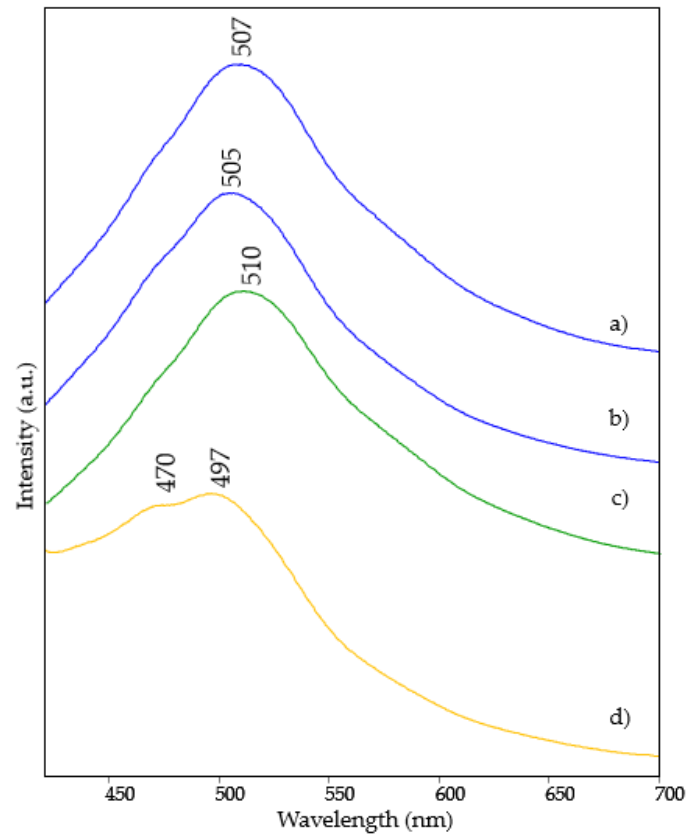

**Figure S2.** Emission spectra of pure binders: a) linseed oil, b) walnut oil, c) egg yolk, d) animal glue.

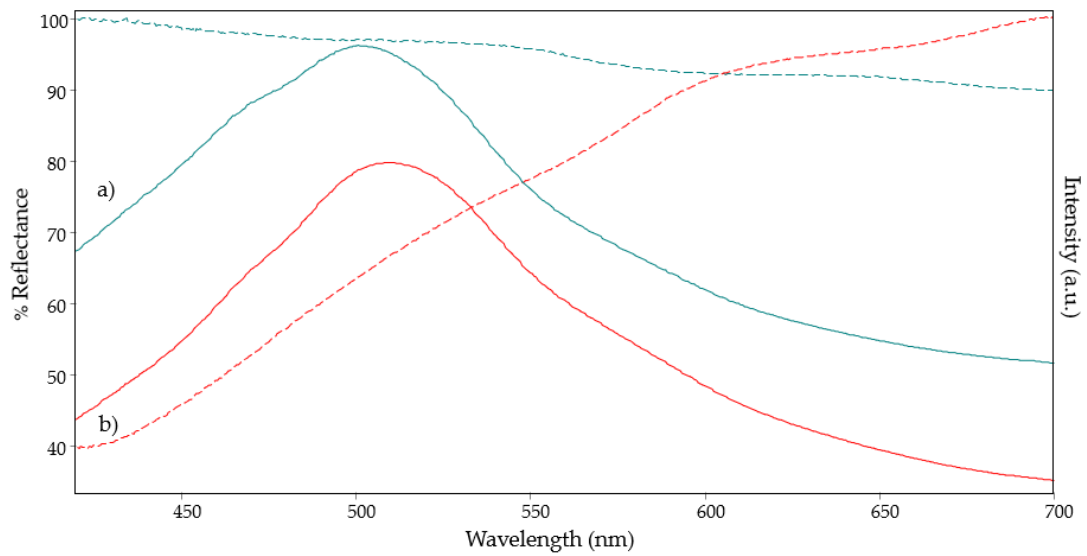

**Figure S3.** Comparison between the emission and the reflectance spectra of a) an egg tempera layer with lead white and of b) pure yolk.

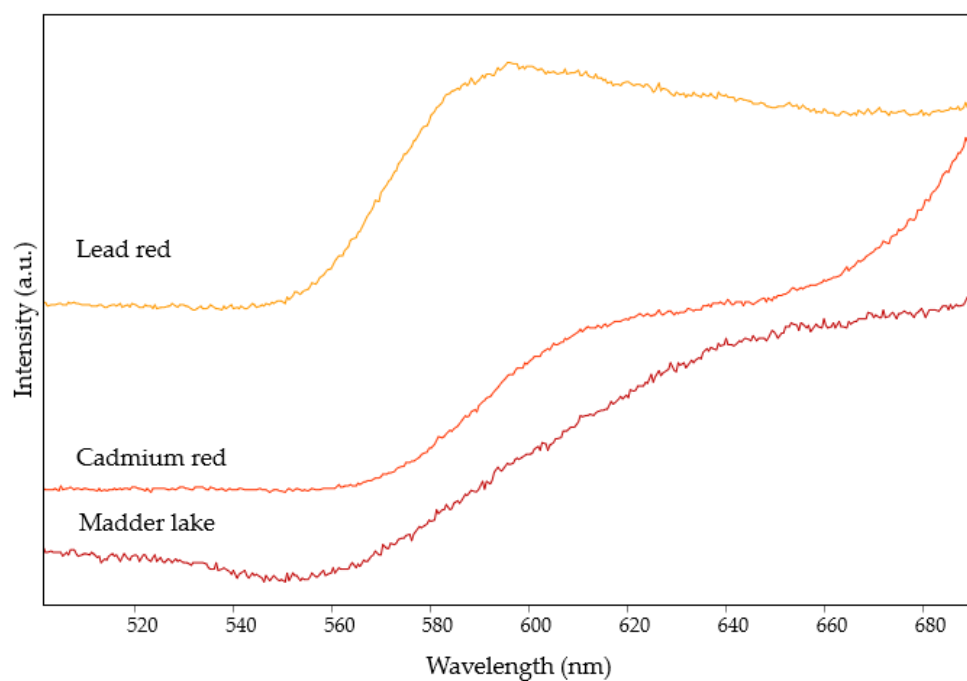

**Figure S4.** Emission spectra of fluorescent pigments used in the model pictorial layers examined.

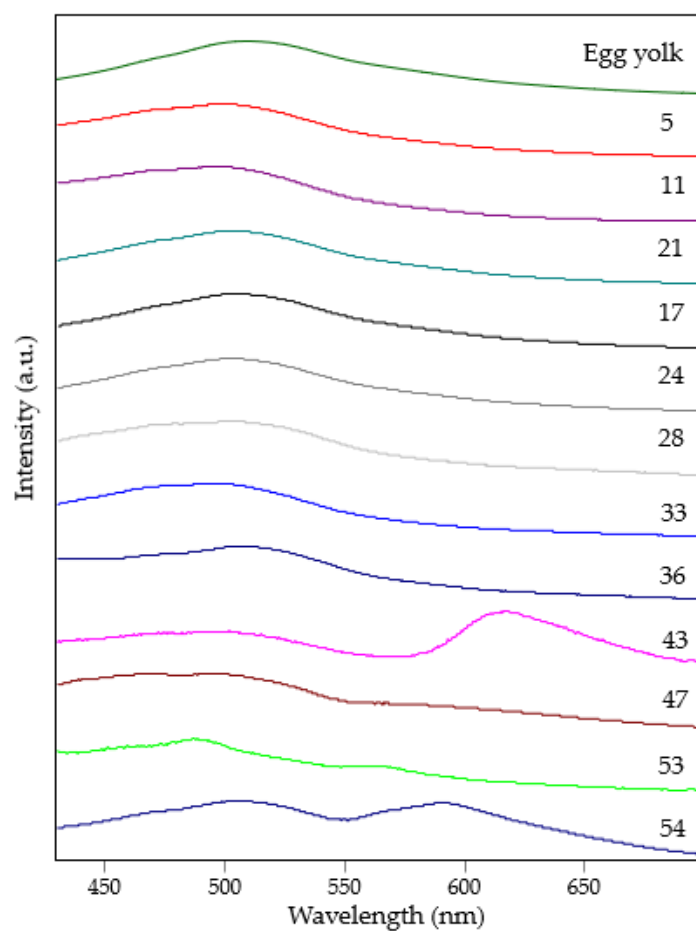

**Figure S5.** Normalized emission spectra of model samples of tempera painting with egg yolk. The spectra of the model samples containing pigments other than white were corrected for self-absorption.

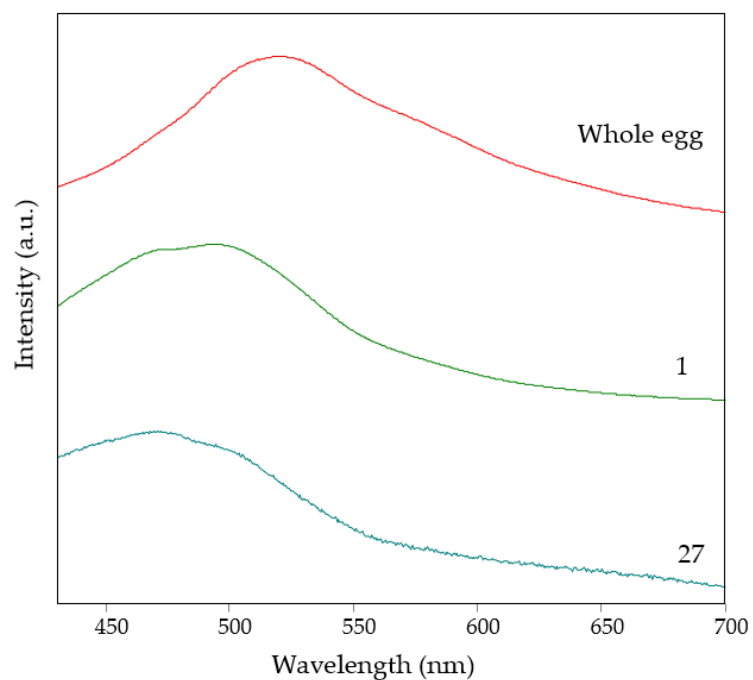

**Figure S6.** Normalized emission spectra of model samples of tempera painting with whole egg. The spectrum of the model sample containing ultramarine blue was corrected for self-absorption.

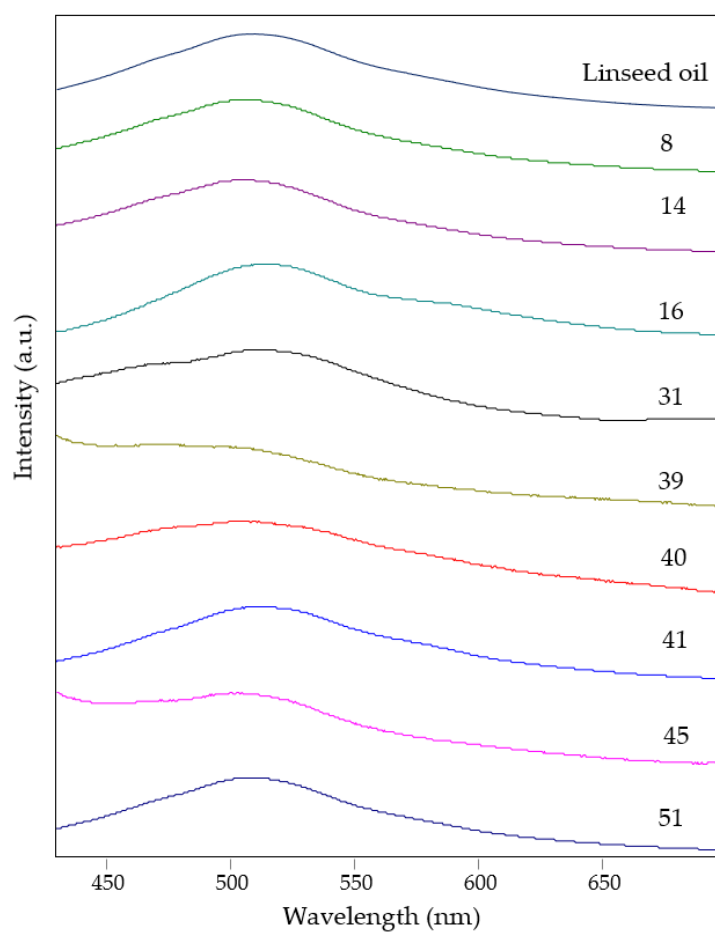

**Figure S7.** Normalized emission spectra of model painting samples with linseed oil as binder. The spectra of the model samples containing pigments other than white were corrected for self-absorption.

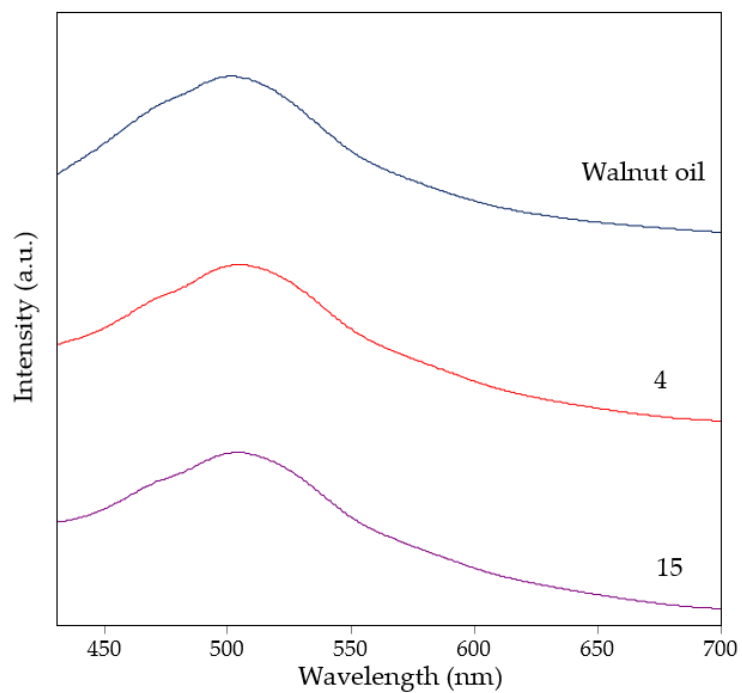

**Figure S8.** Normalized emission spectra of model painting samples of lead white with walnut oil as binder.

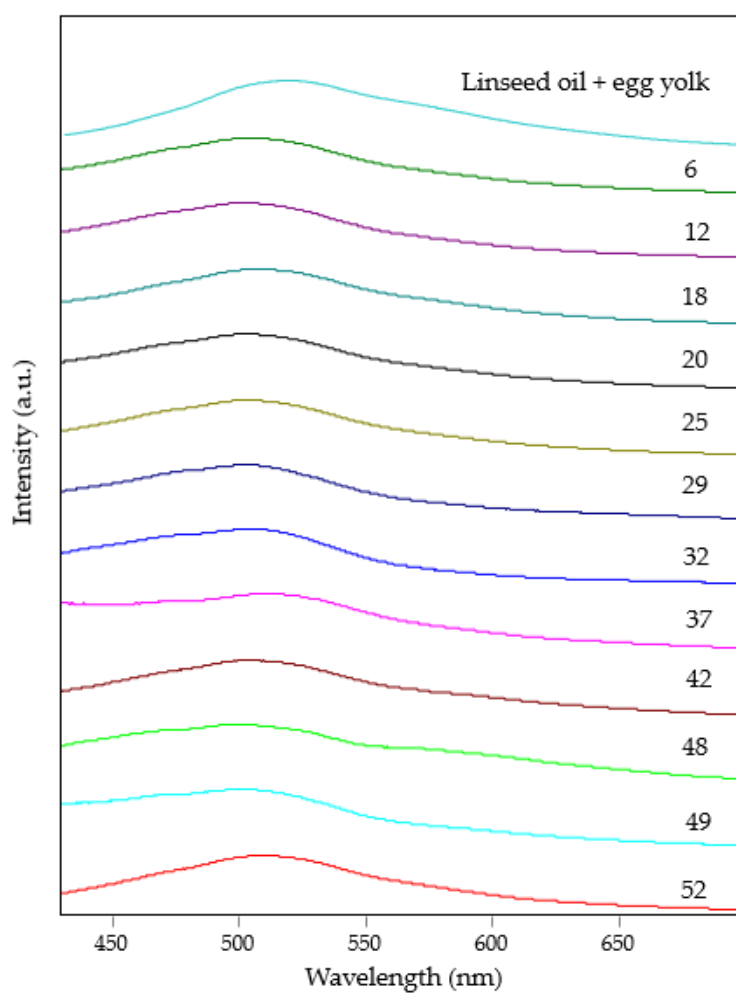

**Figure S9.** Normalized emission spectra of model samples of *tempera grassa* painting with linseed oil. The spectra of the model samples containing pigments other than white were corrected for self-absorption.

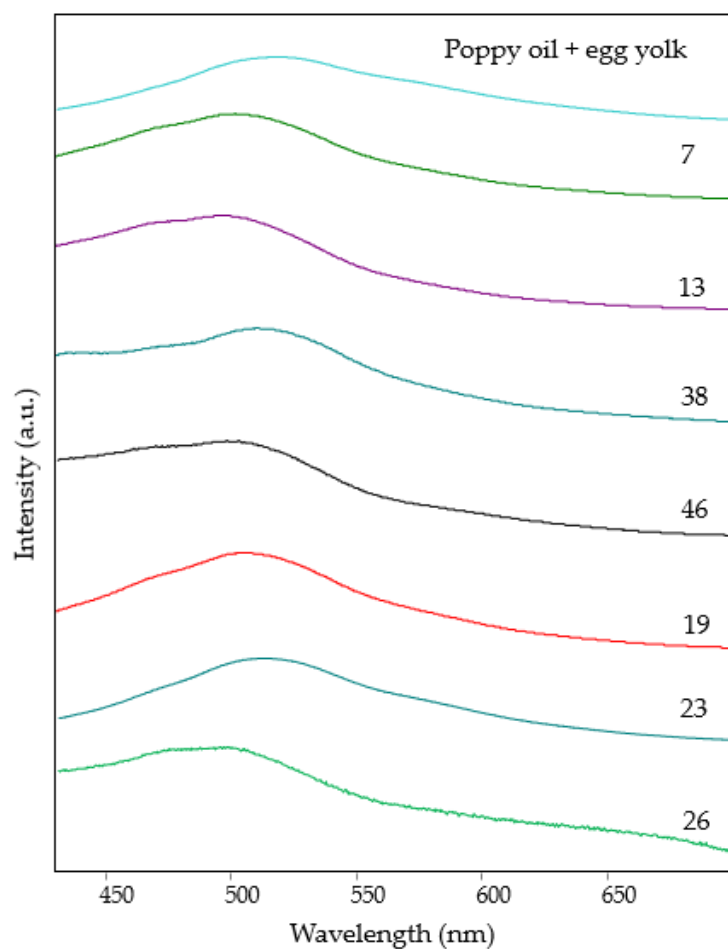

**Figure S10.** Normalized emission spectra of model samples of *tempera grassa* painting with walnut and poppy seed oil and of Doerner's *tempera* painting. The spectra of the model samples containing pigments other than white were corrected for self-absorption.

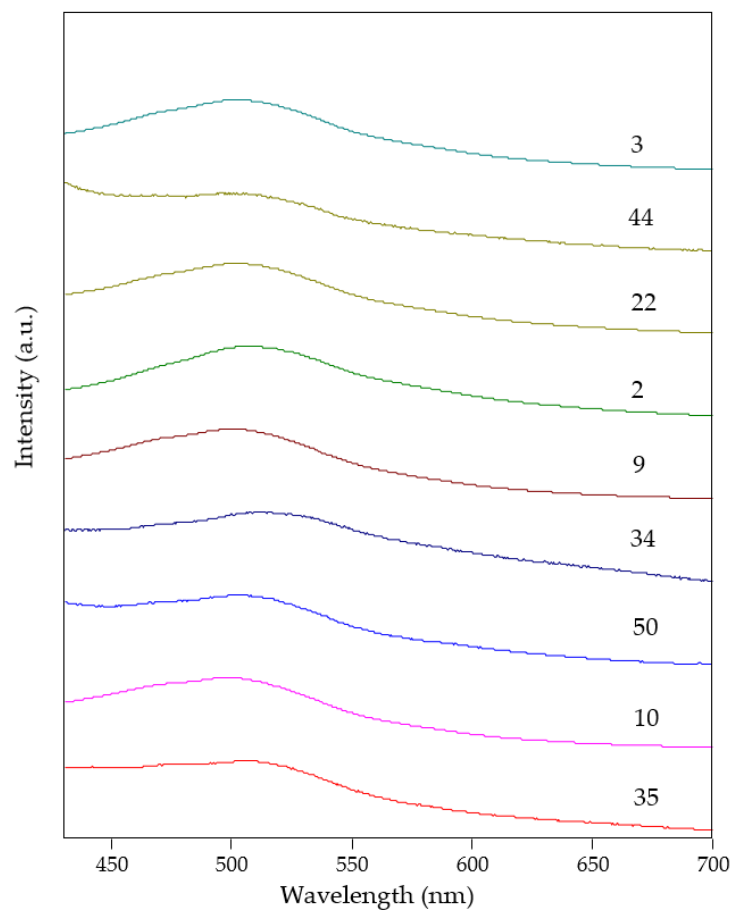

**Figure S11.** Normalized emission spectra of model samples of overlapped paint layers each containing egg or oil binder. The spectra of the model samples containing pigments other than white were corrected for self-absorption.

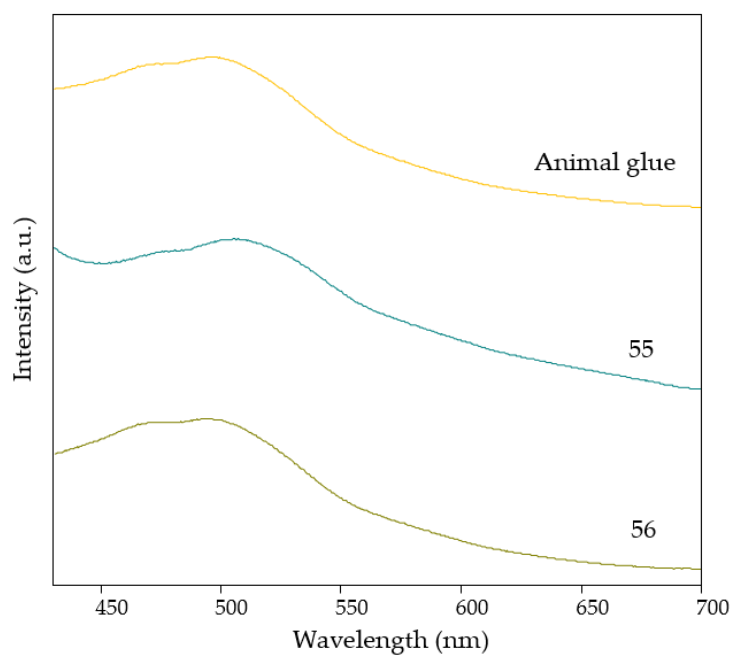

**Figure S12:** Normalized emission spectra of model painting samples of lead white with animal glue or milk as binder.

**Table S1** Wavelengths of the emission maxima of the examined model pictorial layers ( $\lambda_{\text{exc}}$  365 nm). Legend: sh = shoulder; P = pigment.

| Sample n. | Emission maximum (nm) | Sample n. | Emission maximum (nm) |
|-----------|-----------------------|-----------|-----------------------|
| 1         | 493                   | 37        | 509                   |
| 2         | 501                   | 38        | 511                   |
| 3         | 507                   | 39        | 493                   |
| 4         | 506                   | 40        | 496                   |
| 5         | 498                   | 41        | 511, 575sh (P)        |
| 6         | 504                   | 42        | 504, 580sh (P)        |
| 7         | 501                   | 43        | 475sh, 501, 590 (P)   |
| 8         | 507                   | 44        | 470sh, 501            |
| 9         | 472sh, 499            | 45        | 503                   |
| 10        | 472sh, 498            | 46        | 470sh, 504            |
| 11        | 470sh, 496            | 47        | 468sh, 492, 570sh (P) |
| 12        | 470sh, 501            | 48        | 470sh, 500, 570sh (P) |
| 13        | 470sh, 496            | 49        | 470sh, 499            |
| 14        | 505                   | 50        | 470sh, 501            |
| 15        | 501                   | 51        | 506                   |
| 16        | 507                   | 52        | 510                   |
| 17        | 475sh, 507            | 53        | 470sh, 500            |
| 18        | 507                   | 54        | 506, 575 (P)          |
| 19        | 507                   |           |                       |
| 20        | 470sh, 501            |           |                       |
| 21        | 475sh, 501            |           |                       |
| 22        | 501                   |           |                       |
| 23        | 512                   |           |                       |
| 24        | 475sh, 501            |           |                       |
| 25        | 501                   |           |                       |
| 26        | 472sh, 496            |           |                       |
| 27        | 468, 496sh            |           |                       |
| 28        | 468 sh, 505           |           |                       |
| 29        | 501                   |           |                       |
| 30        | 505                   |           |                       |
| 31        | 512                   |           |                       |
| 32        | 506                   |           |                       |
| 33        | 472sh, 496            |           |                       |
| 34        | 514                   |           |                       |
| 35        | 506                   |           |                       |
| 36        | 475sh, 507            |           |                       |
